# Supplementary figures and images for: Genotype imputation for genome-wide association studies
Source: Springer Nature journal article supplement (doi:10.1038/nrg2796), 2010-06-02

Supplementary information S10

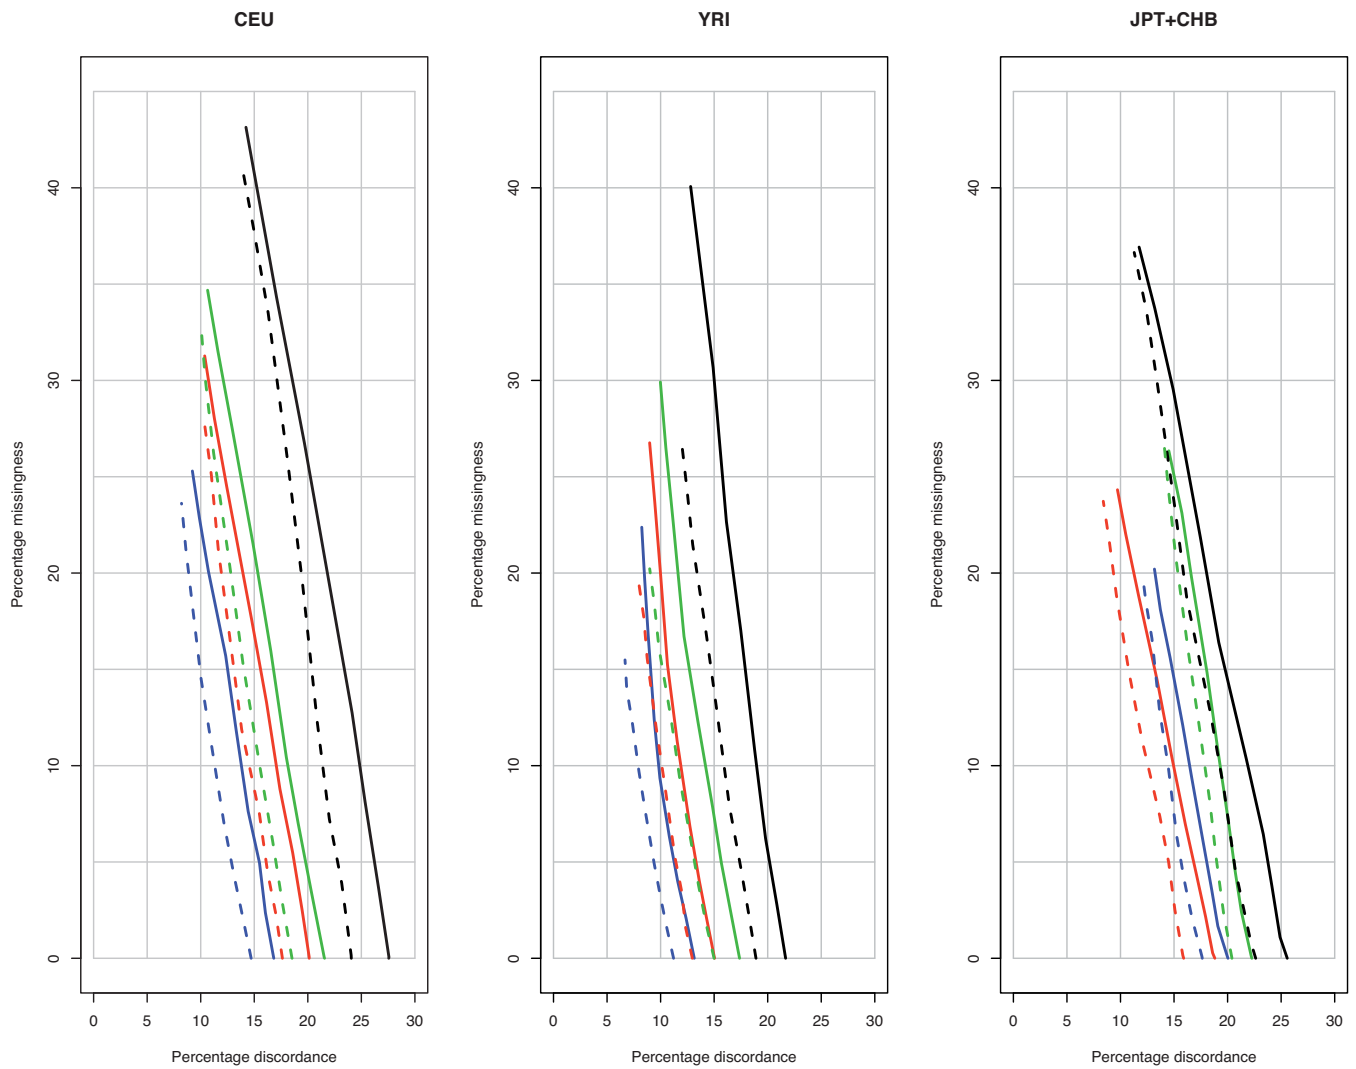

Supplement: 41576_2010_BFnrg2796_MOESM10_ESM.pdf [file 41576_2010_BFnrg2796_MOESM10_ESM.pdf]

Supplementary information S4

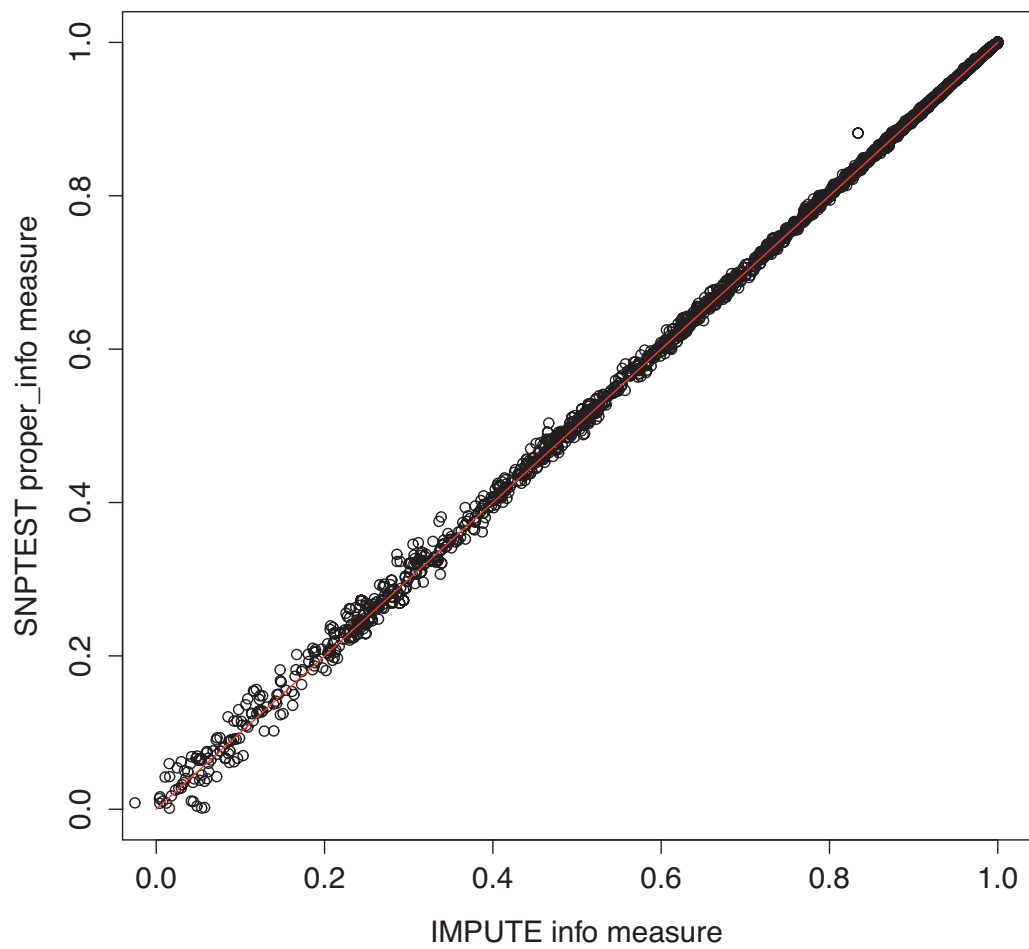

Supplement: 41576_2010_BFnrg2796_MOESM4_ESM.pdf [file 41576_2010_BFnrg2796_MOESM4_ESM.pdf]

Supplementary information S5

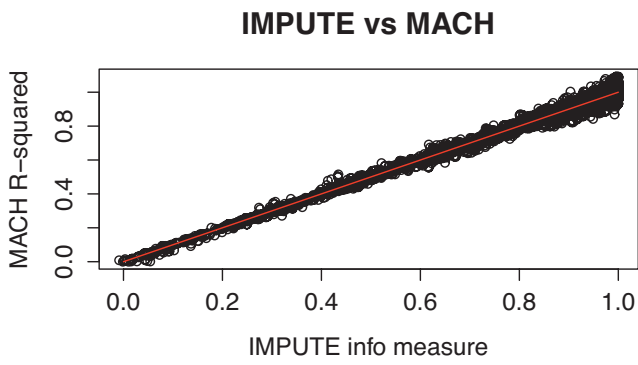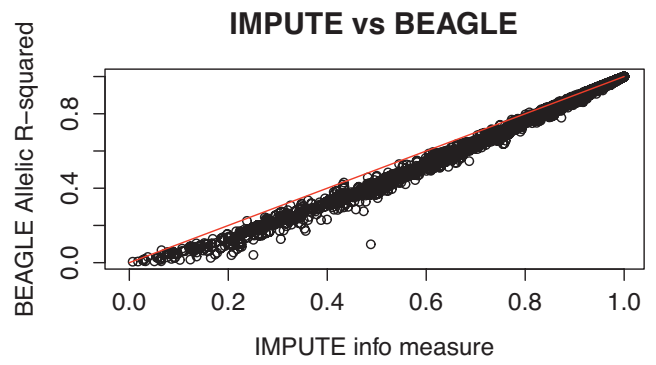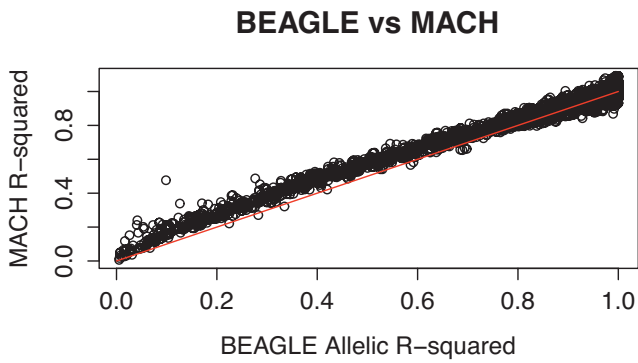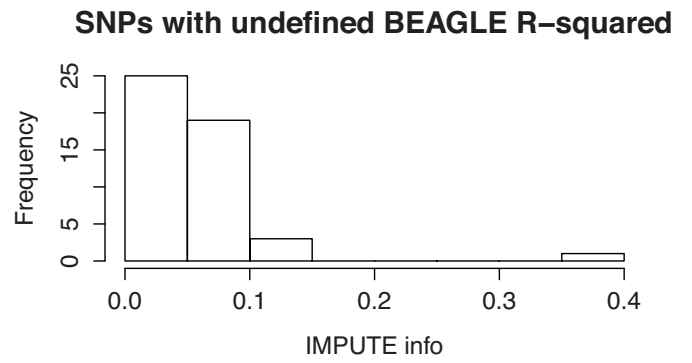

Supplement: 41576_2010_BFnrg2796_MOESM5_ESM.pdf [file 41576_2010_BFnrg2796_MOESM5_ESM.pdf]

Supplementary information S6

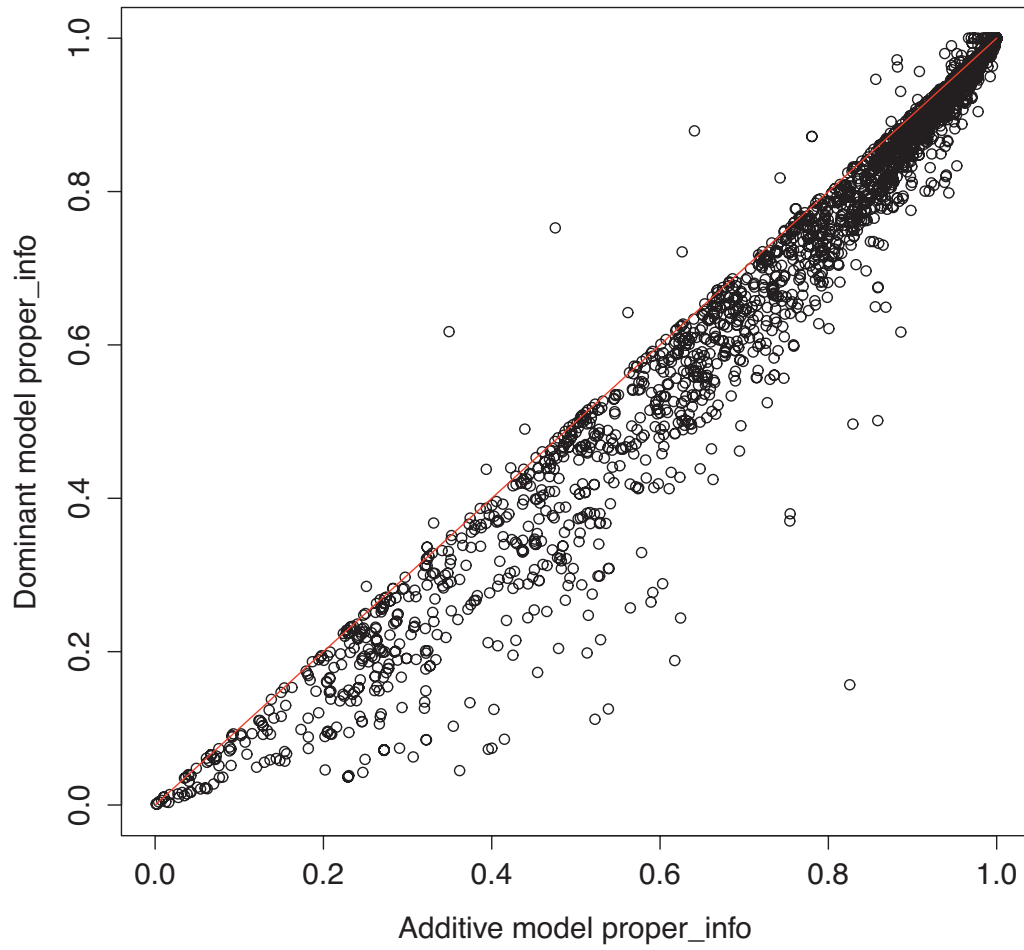

Supplement: 41576_2010_BFnrg2796_MOESM6_ESM.pdf [file 41576_2010_BFnrg2796_MOESM6_ESM.pdf]

Supplementary information S8

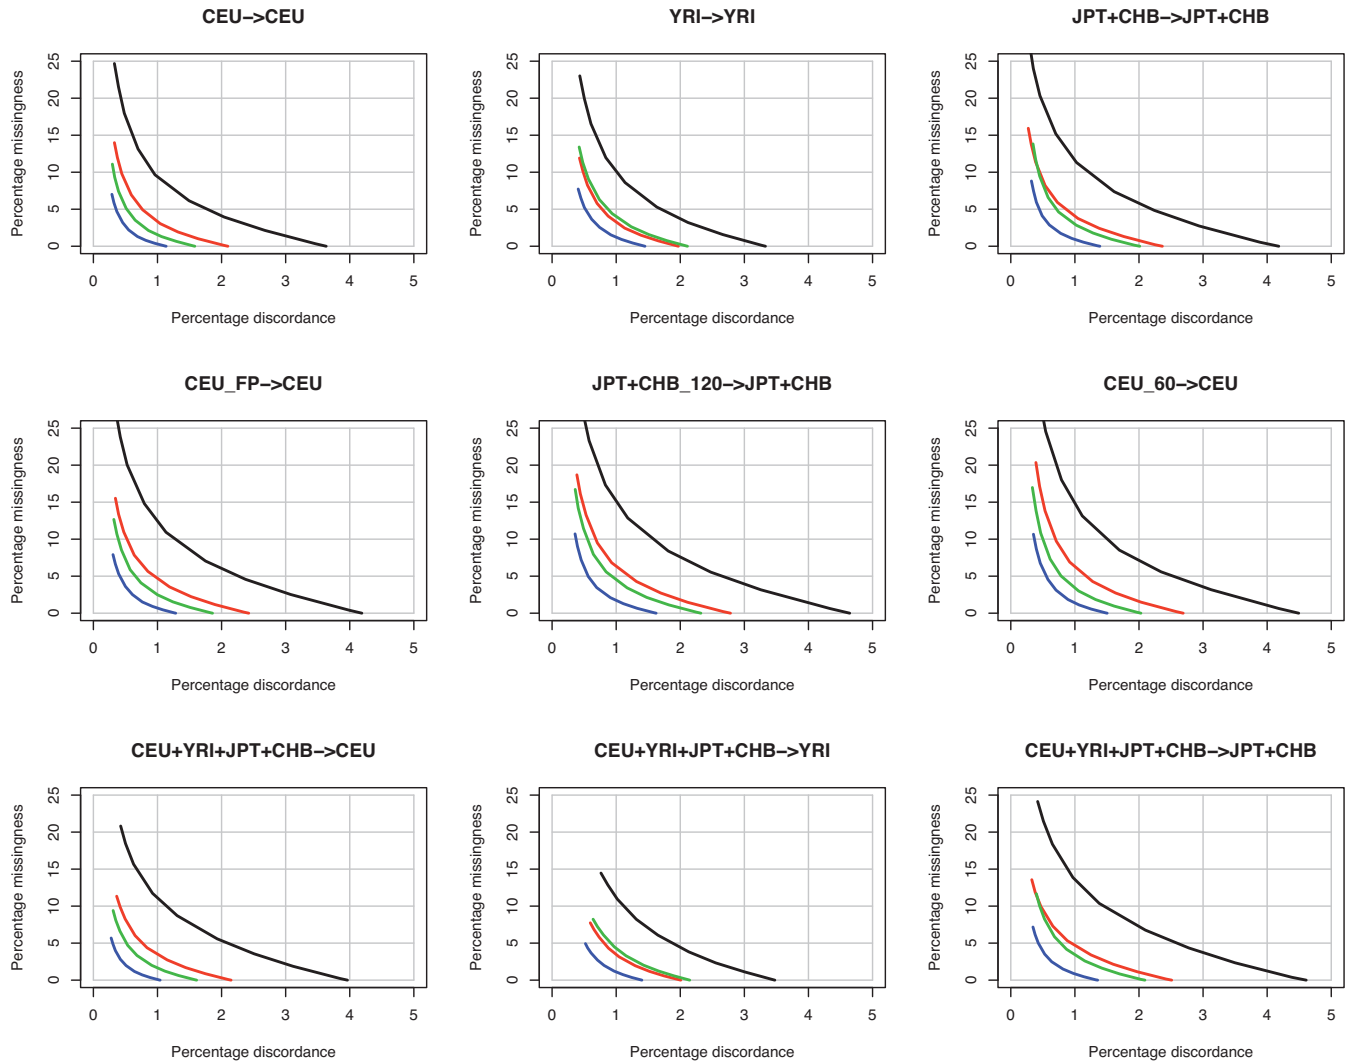

Supplement: 41576_2010_BFnrg2796_MOESM8_ESM.pdf [file 41576_2010_BFnrg2796_MOESM8_ESM.pdf]
